# Supplementary material for: ATM and ATR, two central players of the DNA damage response, are involved in the induction of systemic acquired resistance by extracellular DNA, but not the plant wound response
Source: Front Immunol. 2023 May 15;14:1175786. doi: 10.3389/fimmu.2023.1175786 (PMC10225592; doi:10.3389/fimmu.2023.1175786)
Supplement: Supplementary file 3 [file Table_1.xlsx]

## Sheet: Hoja1
ATM and ATR, two central players of the DNA damage response, are involved the induction of systemic acquired resistance
by extracellular DNA, but not the plant wound response
Isaac Vega-Muñoz , Octavio Martínez-de la Vega , Alfredo Herrera-Estrella, Martin Heil
Supplementary Table S1 | Differentially expressed genes in the Arabidopsis transcriptomic response to self- and nonself-DNA.
The table presents log2(FC)| ≥ 1 values of examples selected from Chiusano et al. (2021) Plants 10:1744
		Self				Nonself
ID	Annotation	1 hpt	8 hpt	16 hpt		1 hpt	8 hpt	16 hpt
JA biosynthesis
AT2G26560	phospholipase A 2A (PLA2A)	2.47162	1.17854	1.94335		2.004	1.10516	5.56729
AT1G55020	lipoxygenase 1 (LOX1)	0.909956	0.999709	0.590162		1.32635	0.527838	1.5162
AT3G45140	lipoxygenase 2 (LOX2)	0.426498	-1.045	-0.0718022		0.659911	-1.36999	-0.398904
AT1G17420	lipoxygenase 3 (LOX3)	0.116605	-0.649283	-0.244624		-0.173944	0.807171	1.36315
AT1G72520	PLAT/LH2 domain-containing lipoxygenase family protein	0.854892	-0.0790583	-0.275746		0.221096	0.831903	3.08155
AT3G22400	LOX5	-0.478677	-0.0572509	-0.361631		0.188572	-0.761266	-0.437326
AT5G42650	AOS
AT3G25770	allene oxide cyclase 2 (AOC2)	0.610125	-0.221063	-0.350389		0.841137	-0.210623	0.0579973
AT3G25760	allene oxide cyclase 1 (AOC1)	0.157862	0.108357	-0.641288		0.163076	-0.940241	-0.668416
AT1G13280	allene oxide cyclase 4 (AOC4)	0.251448	0.071695	-0.529594		0.441729	-0.686811	-0.847877
AT1G76690	12-oxophytodienoate reductase 2 (OPR2)	-0.367464	0.024635	-0.651733		-0.130868	-0.697741	-0.444063
AT2G35690	acyl-CoA oxidase 5 (ACX5)	0.463634	0.18235	-0.0262179		0.180654	-0.641987	-0.167617
AT4G16760	acyl-CoA oxidase 1 (ACX1)	0.768135	0.211315	0.0257667		0.52799	0.114338	0.355524
AT4G29010	ABNORMAL INFLORESCENCE MERISTEM (AIM1)	0.0550268	0.0409572	-0.11127		-0.00705931	-0.512805	-0.0614972
AT2G33150	peroxisomal 3-ketoacyl-CoA thiolase 3 (PKT3)	0.424214	-0.122967	-0.29319		0.102458	-0.424933	-0.192849
SA biosynthesis
AT1G18870	isochorismate synthase 2 (ICS2)	0.742367	-0.772912	0.372254		1.15274	-2.19828	0.00370259
AT1G74710	ENHANCED DISEASE SUSCEPTIBILITY TO ERYSIPHE ORONTII 16 (EDS16)	-0.437709	-0.126163	-0.255446		-0.395348	-0.122405	0.512998
AT3G53260	phenylalanine ammonia-lyase 2 (PAL2)	-0.163629	0.0386329	-0.309696		0.582026	-0.730014	0.269346
AT5G26920	Cam-binding protein 60-like G (CBP60G)	-0.0826854	0.266348	0.403939		-0.121287	1.1298	3.38156
AT5G65210	TGA1	-0.488815	0.137313	-0.047966		-0.34319	0.69934	0.489978
AT1G22070	TGA1A-related gene 3 (TGA3)	-0.482153	-0.17243	-0.0531534		-0.0259983	-0.506407	-0.0701575
AT4G39030	ENHANCED DISEASE SUSCEPTIBILITY 5 (EDS5)	0.093497	0.0248076	-0.237943		0.197858	-0.933515	0.236544
AT3G52430	PHYTOALEXIN DEFICIENT 4 (PAD4)	-1.04026	-0.00306144	-0.0242425		-0.38581	0.298996	1.12603
AT1G16300	glyceraldehyde-3-phosphate dehydrogenase of plastid 2 (GAPCP-2)	0.764998	0.346	-0.23223		0.196753	-0.0395619	0.185808
PR proteins
AT3G49110	peroxidase CA (PRXCA)	3.74488	1.87971	1.39977		1.49737	0.922258	4.339
AT3G49120	peroxidase CB (PRXCB)	1.41566	0.33396	0.97435		0.258958	0.419205	1.97013
AT5G24620	Pathogenesis-related thaumatin superfamily protein	0.622976	0.00238724	0.0720932		0.384735	0.439981	-0.167241
AT3G04720	pathogenesis-related 4 (PR4)	0.239004	1.07189	0.460514		0.631637	1.80986	2.03451
AT5G40020	Pathogenesis-related thaumatin superfamily protein	0.130311	-0.24984	-0.111767		0.615559	-1.19281	-0.291741
AT1G11580	methylesterase PCR A (PMEPCRA)	0.0736288	0.0864949	0.0347949		0.687671	0.198585	-0.0404144
AT1G20030	Pathogenesis-related thaumatin superfamily protein	-0.102235	-0.707648	-0.376044		-0.151405	-1.10916	-0.677276
AT1G73620	Pathogenesis-related thaumatin superfamily protein	-0.237727	0.207421	-0.691684		0.282961	-0.841429	-0.764331
AT4G29940	pathogenesis related homeodomain protein A (PRHA)	-0.241732	0.235458	0.219288		-0.238179	0.696778	0.187912
AT5G66590	CAP (Cysteine-rich secretory proteins, Antigen 5, and Pathogenesis-related 1 protein) superfamily protein	-0.407076	-0.0125668	-0.368597		-0.660637	-1.62854	-0.834744
AT4G07820	CAP (Cysteine-rich secretory proteins, Antigen 5, and Pathogenesis-related 1 protein) superfamily protein	-0.518478	-0.27807	0.262593		-1.59318	1.70463	2.83249
AT1G78780	pathogenesis-related family protein	-0.642707	-0.271802	0.0280457		-0.811019	-0.232023	-0.180424
AT1G50060	CAP (Cysteine-rich secretory proteins, Antigen 5, and Pathogenesis-related 1 protein) superfamily protein	-0.841722	-0.102861	0.47559		-0.0545172	-1.13677	-0.686332
Glutathione-S-transferases
AT2G29470	glutathione S-transferase tau 3 (GSTU3)	4.42951	3.30416	0.401826		1.68152	2.38911	2.37846
AT1G02920	glutathione S-transferase TAU 11 (GSTU11)	3.3057	0.71283	1.12776		0.350917	1.55953	4.66584
AT4G02520	glutathione S-transferase PHI 2 (GSTF2)	3.05513	1.38185	0.918957		2.20745	1.58558	3.60443
AT1G69920	glutathione S-transferase TAU 12 (GSTU12)	4.34003	1.74046	2.93085		3.91443	1.77838	6.44238
AT5G44990	Glutathione S-transferase family protein	2.84093	1.91159	3.15973		1.77577	2.59365	5.97241
AT5G44990	Glutathione S-transferase family protein	2.84093	1.91159	3.15973		1.77577	2.59365	5.97241
AT2G02930	glutathione S-transferase F3 (GSTF3)	2.79665	0.803643	1.01389		2.31848	1.1588	2.72831
AT1G02920	glutathione S-transferase 7 (GSTF7)	2.44288	1.17561	2.04979		2.25337	1.73726	3.52411
AT1G02930	glutathione S-transferase 6 (GSTF6)	2.22479	0.993001	1.38379		1.97029	1.42986	2.58144
AT5G02780	glutathione transferase lambda 1 (GSTL1)	2.12947	0.16878	1.87511		2.48456	0.00234852	3.35283
AT2G29460	glutathione S-transferase tau 4 (GSTU4)	2.10304	1.15837	0.24911		1.4267	0.823359	1.28539
AT4G04610	APS reductase 1 (APR1)	2.03168	0.896488	0.68705		2.59747	-0.617174	2.02364
AT4G21990	APS reductase 3 (APR3)	1.48539	0.290935	-0.308905		1.8358	-0.668256	1.10622
AT1G74590	glutathione S-transferase TAU 10 (GSTU10)	0.84418	0.721394	1.34493		1.10482	0.999307	2.3573
AT2G30860	glutathione S-transferase PHI 9 (GSTF9)	0.809162	0.276649	-0.32603		0.836778	0.707366	0.601628
AT1G17180	glutathione S-transferase TAU 25 (GSTU25)	0.663273	-0.230459	-0.986618		0.568463	-1.15009	1.50951
AT1G27130	glutathione S-transferase tau 13 (GSTU13)	0.436865	0.173275	-0.142971		0.471962	0.13898	0.0114931
AT2G30870	glutathione S-transferase PHI 10 (GSTF10)	0.430095	0.548683	-0.0977404		0.745949	0.424968	0.150194
AT2G47730	glutathione S-transferase phi 8 (GSTF8)	0.396409	-0.207312	-0.379303		0.380859	0.107397	-0.194298
AT1G78380	glutathione S-transferase TAU 19 (GSTU19)	0.373	0.112469	-0.540527		0.155147	-0.167438	-0.129766
AT5G12110	Glutathione S-transferase, C-terminal-like	0.369494	-0.0306408	0.305868		-0.151014	1.42118	0.831996
AT2G29420	glutathione S-transferase tau 7 (GSTU7)	0.307099	0.260185	-0.670192		0.069141	-0.132319	-0.347942
AT2G29440	glutathione S-transferase tau 6 (GSTU6)	0.0849572	0.99477	0.103826		0.651801	-0.14323	-0.206271
AT1G30230	Glutathione S-transferase, C-terminal-like	0.0821825	0.230581	0.0599925		-0.0837056	0.651616	0.224329
AT4G19880	Glutathione S-transferase family protein	0.0595912	0.437312	-0.421043		0.0795379	0.506032	0.836126
AT2G29480	glutathione S-transferase tau 2 (GSTU2)	-0.0658821	-0.134703	-0.117875		0.220552	1.03704	1.35965
AT5G17220	glutathione S-transferase phi 12 (GSTF12)	-0.113908	0.148583	-0.405712		-0.171337	-1.99147	-0.585185
AT3G43800	glutathione S-transferase tau 27 (GSTU27)	-0.220333	0.166711	-0.0551713		0.453651	-0.215908	-0.181975
AT1G27140	glutathione S-transferase tau 14 (GSTU14)	-0.358066	0.091549	-1.82772		-0.644316	-1.82006	-2.36375
AT1G78340	glutathione S-transferase TAU 22 (GSTU22)	-0.835931	0.27172	-0.582159		-0.752168	-0.678096	0.500486
AT3G09270	glutathione S-transferase TAU 8 (GSTU8)	-0.924037	0.33993	0.0586097		-0.654185	0.0576811	-0.0834167
AT1G53680	glutathione S-transferase TAU 28 (GSTU28)	-1.12004	-0.221259	-0.632412		-0.788475	-0.781193	-1.14199
AT5G62480	glutathione S-transferase tau 9 (GSTU9)	-1.27135	-0.10651	-0.0411151		-0.546863	0.068487	1.96858
Nucleases
AT1G19660	Wound-responsive family protein	-0.34518	-0.498808	-0.172234		-0.346059	-0.835487	-0.474116
AT4G21880	Pentatricopeptide repeat (PPR) superfamily protein	-0.353863	0.271089	0.693903		-0.211745	1.10457	0.846836
AT4G26800	Pentatricopeptide repeat (PPR) superfamily protein	-0.360143	0.522057	0.439912		-0.293087	1.1701	0.862559
AT1G75380	bifunctional nuclease in basal defense response 1 (BBD1)	-0.367026	-0.462609	0.139441		-0.350934	-0.914603	-0.338998
AT4G27490	3'-5'-exoribonuclease family protein	-0.385799	0.312935	0.15729		-0.0804245	1.13478	0.747294
AT1G52500	MMH-2	-0.431913	0.393905	0.0631948		-0.163121	0.93568	0.338464
AT3G44260	Polynucleotidyl transferase, ribonuclease H-like superfamily protein	-0.504948	-1.02803	0.448649		-0.867441	0.363561	-0.41844
AT2G31970	RAD50	-0.507335	0.23951	0.127216		-0.400086	0.682201	0.260671
AT1G07590	Tetratricopeptide repeat (TPR)-like superfamily protein	-0.57277	-0.0282656	-0.419806		-0.528223	-0.185713	-0.779235
AT1G14210	Ribonuclease T2 family protein	-0.574761	0.0735245	0.292368		0.0141311	0.5455	0.454162
AT4G21170	Tetratricopeptide repeat (TPR)-like superfamily protein	-0.577123	0.33129	0.407769		-0.331475	0.839469	0.571321
AT5G22250	Polynucleotidyl transferase, ribonuclease H-like superfamily protein	-0.63822	-1.20657	0.190837		-1.20422	-0.0624243	0.232881
AT2G41460	apurinic endonuclease-redox protein (ARP)	-0.0277015	-0.026215	0.134913		-0.206819	0.596738	0.55643
AT1G18090	5'-3' exonuclease family protein	0.0826279	0.379898	0.270995		0.042741	0.895812	0.22334
AT1G13810	Restriction endonuclease, type II-like superfamily protein	-0.0665551	0.306988	-0.0338855		0.127659	1.04607	0.879328
AT5G14580	polyribonucleotide nucleotidyltransferase, putative	-0.143485	0.361712	-0.391656		0.0526089	1.25906	1.0206
AT1G77680	Ribonuclease II/R family protein	0.308823	0.0764585	0.109088		0.379037	-0.355596	0.152614
AT3G60500	ECERIFERUM 7 (CER7)	0.138448	0.382801	0.153069		-0.0282138	0.643621	0.411216
AT1G48410	ARGONAUTE 1 (AGO1)	0.305546	-0.122904	0.00645121		0.0618333	-0.726771	-0.266808
TIR domain
AT1G57630	Toll-Interleukin-Resistance (TIR) domain family protein	3.24901	1.22325	1.91409		0.681439	1.57827	5.60653
AT4G11170	Disease resistance protein (TIR-NBS-LRR class) family	0.90547	1.78351	1.44041		0.679584	2.47607	5.56427
AT3G04220	Disease resistance protein (TIR-NBS-LRR class) family	0.880818	0.339254	0.483942		0.458746	-0.597442	2.74061
AT1G72900	Toll-Interleukin-Resistance (TIR) domain-containing protein	0.761664	0.626432	-0.216126		0.527015	1.3556	1.1869
AT1G72850	Disease resistance protein (TIR-NBS class)	0.6439	-0.44906	0.397465		1.23144	0.728986	0.409001
AT5G45240	Disease resistance protein (TIR-NBS-LRR class)	0.633422	0.0301621	2.36399		0.186333	1.23724	6.35239
AT4G19520	disease resistance protein (TIR-NBS-LRR class) family	0.548038	0.0710196	0.27007		0.322578	0.251177	1.31154
AT1G66090	Disease resistance protein (TIR-NBS class)	0.529456	-0.465413	-0.0359273		-0.39281	2.06777	2.36925
AT4G19530	disease resistance protein (TIR-NBS-LRR class) family	0.313849	-0.0670504	1.61267		0.396082	0.20693	1.35377
AT5G41750	Disease resistance protein (TIR-NBS-LRR class) family	0.243942	0.548371	0.635284		-0.211714	1.62474	3.73036
AT5G17970	Disease resistance protein (TIR-NBS-LRR class) family	0.222337	1.56126	0.078781		0.941664	1.50086	5.01685
AT4G11340	Disease resistance protein (TIR-NBS-LRR class) family	0	1.77158	3.55158		1.55686	2.31621	8.05538
AT4G14370	Disease resistance protein (TIR-NBS-LRR class) family	-0.15414	0.145399	0.520854		-0.290035	0.712479	1.55263
AT2G20142	Toll-Interleukin-Resistance (TIR) domain family protein	-0.249211	-0.0749112	0.52807		-0.10252	0.200055	1.74834
AT1G72930	toll/interleukin-1 receptor-like (TIR)	-0.372197	0.174632	-0.840422		-0.189909	0.870433	-0.136053
AT5G45000	Disease resistance protein (TIR-NBS-LRR class) family	-0.38993	0.458553	0.420866		0.834414	1.21721	1.33615
AT5G41550	Disease resistance protein (TIR-NBS-LRR class) family	-0.433412	-0.365183	0.308274		-0.190547	-0.501329	1.82717
AT5G41740	Disease resistance protein (TIR-NBS-LRR class) family	-0.473627	0.12454	-0.0557539		-0.528134	1.55134	1.85891
AT1G72910	Toll-Interleukin-Resistance (TIR) domain-containing protein	-0.591929	-0.37783	-0.803525		-0.962931	1.15039	-0.196898
AT5G46520	Disease resistance protein (TIR-NBS-LRR class) family	-0.601612	-0.0274465	-0.0563342		-0.0737816	0.183928	1.53452
AT1G31540	Disease resistance protein (TIR-NBS-LRR class) family	-0.758127	0.144557	-0.276015		-0.184487	0.067431	0.228793
AT1G72950	Disease resistance protein (TIR-NBS class)	-0.82336	-1.06825	-0.16791		-1.10383	0.272542	1.26199
AT5G46490	Disease resistance protein (TIR-NBS-LRR class) family	-0.839159	0.409833	0.10042		-0.582334	0.412786	-0.0377362
AT5G44910	Toll-Interleukin-Resistance (TIR) domain family protein	-1.16561	0.353716	-0.127762		-0.513848	0.177549	0.913736
AT5G44920	Toll-Interleukin-Resistance (TIR) domain family protein	-1.25966	-0.468548	-0.125436		-0.453816	-0.125577	-0.735818
AT1G65850	Disease resistance protein (TIR-NBS-LRR class) family	-1.35405	0.766403	0.461051		-1.16246	0.914241	0.492928
AT4G19925	Toll-Interleukin-Resistance (TIR) domain family protein	-4.06117	0.277478	1.46441		1.27762	-0.18898	4.6013
